# Supplementary material for: One-pot synthesis of highly greenish-yellow fluorescent nitrogen-doped graphene quantum dots for pyrophosphate sensing via competitive coordination with Eu3+ions
Source: Royal Society of Chemistry journal article supplement (doi:10.1039/c5nr04005a), 2015-01-01
Supplement: c5nr04005a1.pdf [file c5nr04005a1.pdf]

## Supporting information

### One-pot synthesis of highly greenish-yellow fluorescent nitrogen-doped graphene quantum dots for pyrophosphate sensing via competitive coordination with $\text{Eu}^{3+}$ ions

Liping Lin<sup>a</sup>, Xinhong Song<sup>a</sup>, Yiyi Chen<sup>a</sup>, Mingcong Rong<sup>a</sup>, Tingting Zhao<sup>c</sup>, Yaqi Jiang<sup>a</sup>, Yiru Wang<sup>a\*</sup>, Xi Chen<sup>a,b\*</sup>

<sup>a</sup>Department of Chemistry and the MOE Key Laboratory of Spectrochemical Analysis & Instrumentation, College of Chemistry and Chemical Engineering, Xiamen University, Xiamen 361005, China

<sup>b</sup>State Key Laboratory of Marine Environmental Science, Xiamen University, Xiamen 361005, China

<sup>c</sup>Xiamen Huaxia University, Xiamen, 361024, China

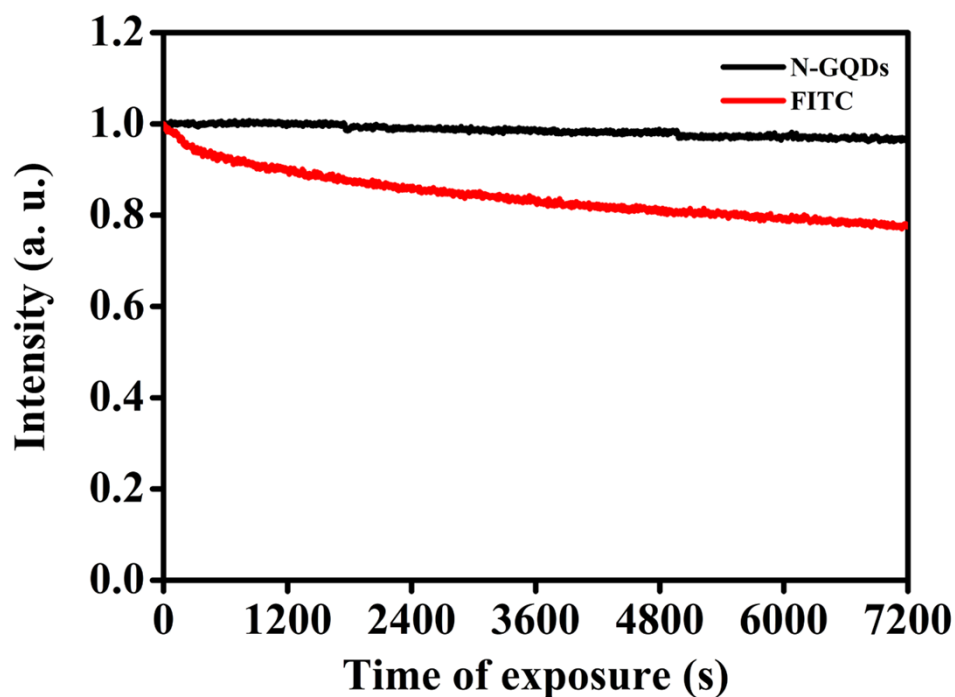

**Figure S1** Photostability of the N-GQDs and FITC under continuous irradiation for 2 h.

\*Corresponding author. Tel: +86 592 2184530; Fax: +86 592 2184530;

E-mail address: xichen@xmu.edu.cn (Xi Chen)

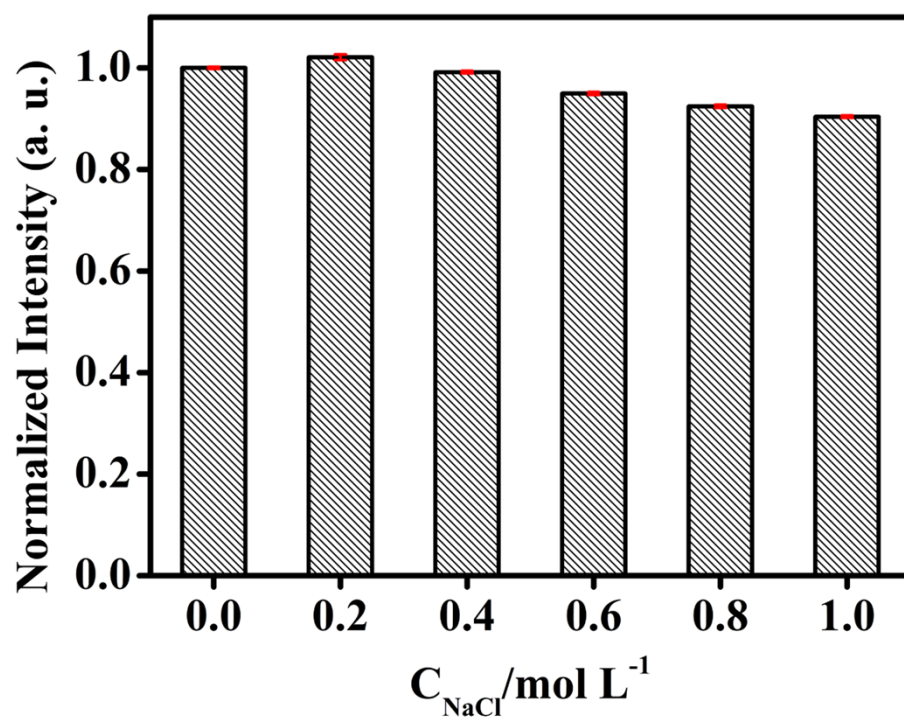

**Figure S2** The effect of NaCl concentration on N-GQDs fluorescence intensity.

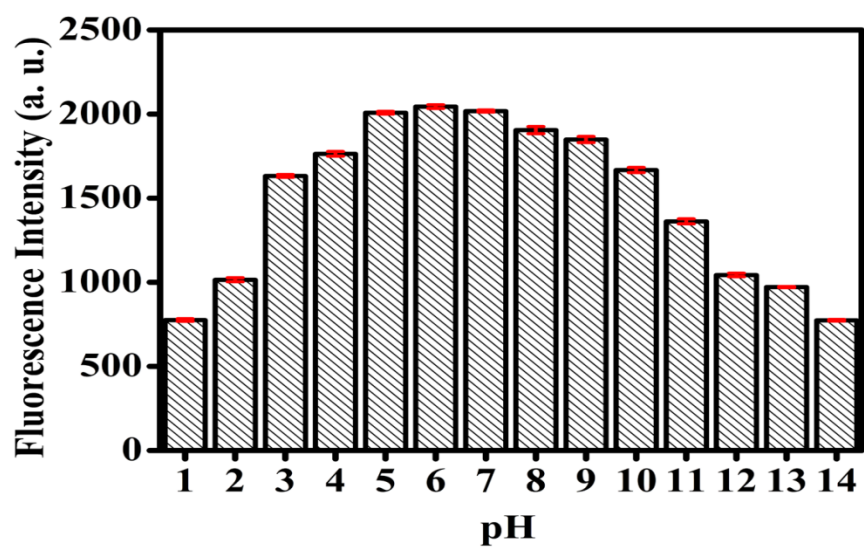

**Figure S3** Effect of different pH values on the fluorescence intensity of N-GQDs.

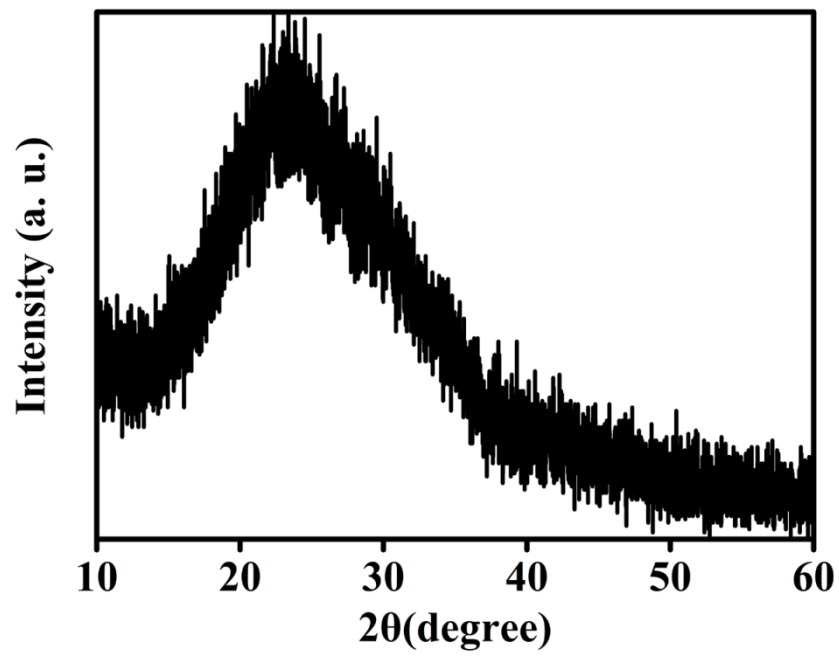

**Figure S4** XRD pattern the N-GQDs.

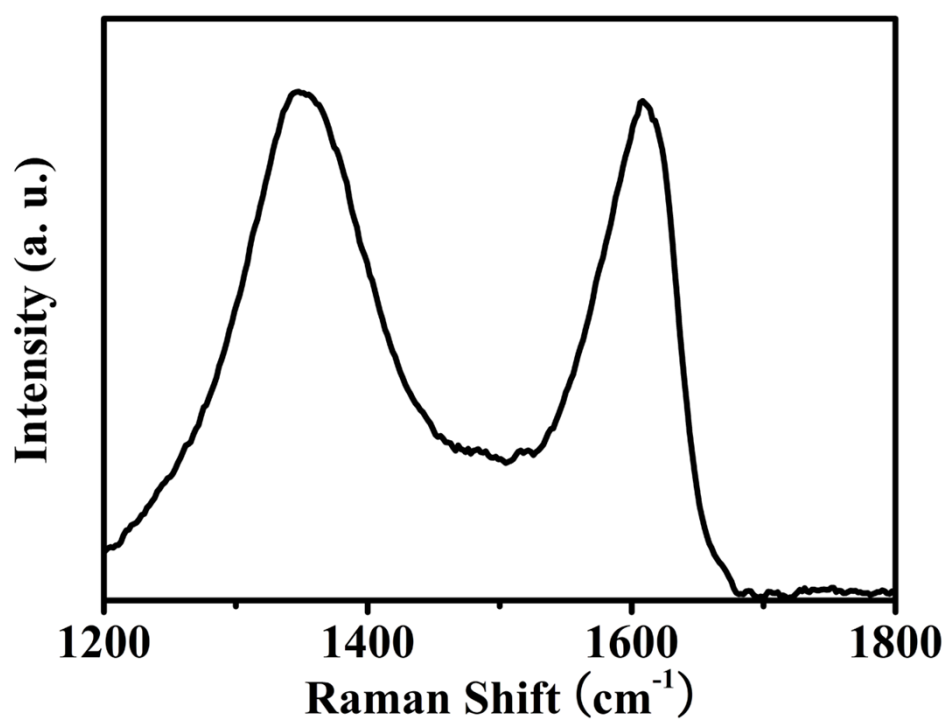

**Figure S5** Raman spectrum of the N-GQDs.

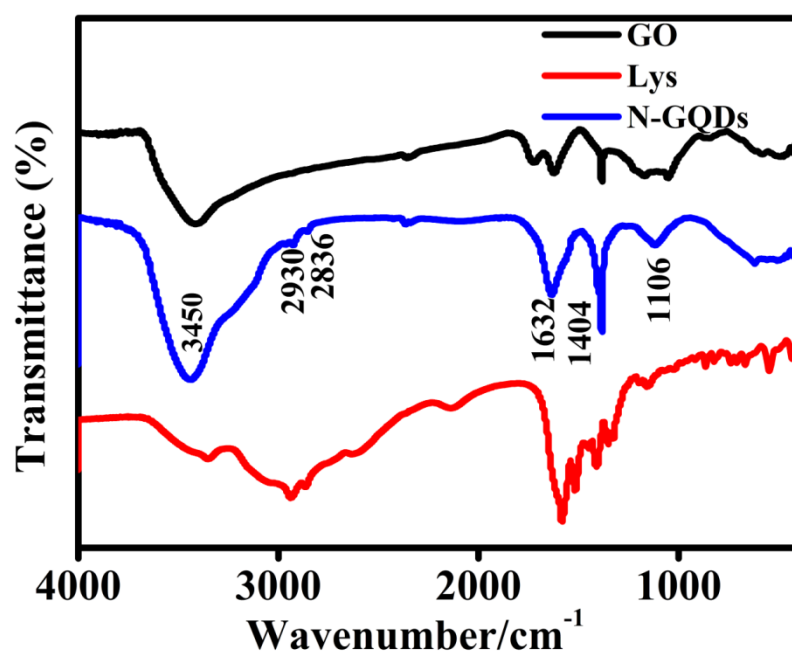

Figure S6 FTIR spectra of the N-GQDs.
